# Supplementary material for: Supramolecular scaffold–directed two-dimensional assembly of pentacene into a configuration to facilitate singlet fission
Source: PubMed Central journal article supplement (PMC11397492; doi:10.1126/sciadv.adn7763), 2024-09-13
Supplement: sciadv.adn7763_sm.pdf [file sciadv.adn7763_sm.pdf]

Supplementary Materials for  
**Supramolecular scaffold–directed two-dimensional assembly of pentacene  
into a configuration to facilitate singlet fission**

Masato Fukumitsu *et al.*

Corresponding author: Tomoya Fukui, [fukui@res.titech.ac.jp](mailto:fukui@res.titech.ac.jp); Nikolai V. Tkachenko, [nikolai.tkachenko@tuni.fi](mailto:nikolai.tkachenko@tuni.fi);  
Taku Hasobe, [hasobe@chem.keio.ac.jp](mailto:hasobe@chem.keio.ac.jp); Takanori Fukushima, [fukushima@res.titech.ac.jp](mailto:fukushima@res.titech.ac.jp)

*Sci. Adv.* **10**, eadn7763 (2024)  
DOI: 10.1126/sciadv.adn7763

**This PDF file includes:**

Figs. S1 to S36  
Tables S1 and S2

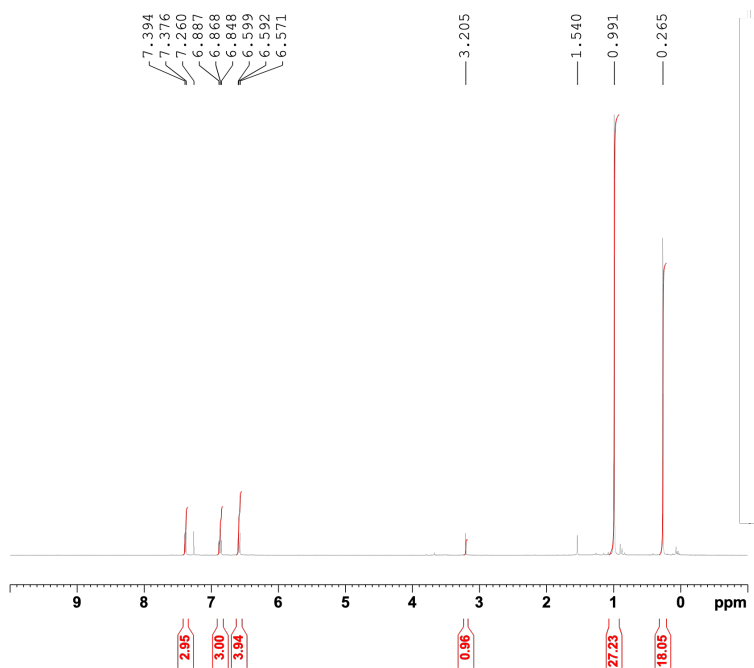

**Fig. S1. Characterization of 4.**  $^1\text{H}$  NMR spectrum (400 MHz) of **4** in  $\text{CDCl}_3$  at 25 °C.

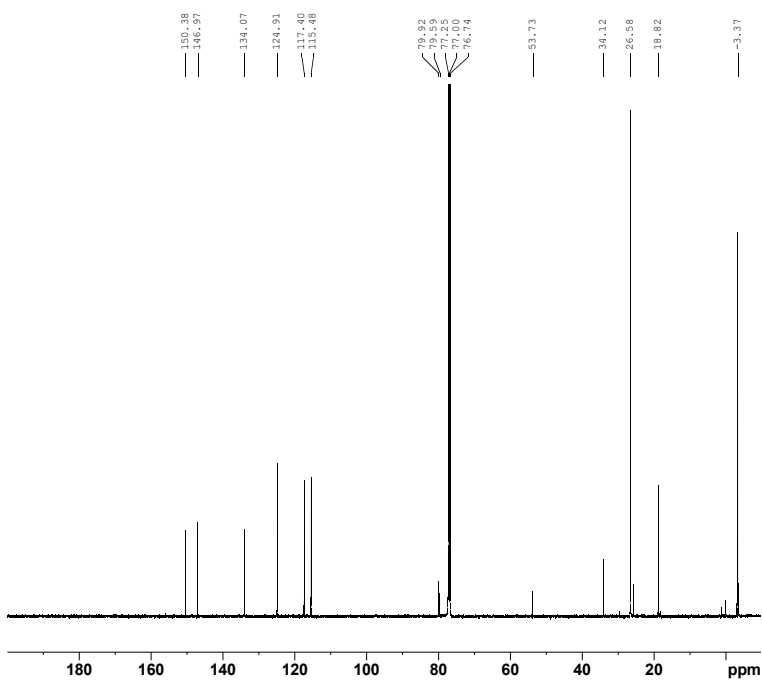

**Fig. S2. Characterization of 4.**  $^{13}\text{C}$  NMR spectrum (126 MHz) of **4** in  $\text{CDCl}_3$  at 25 °C.

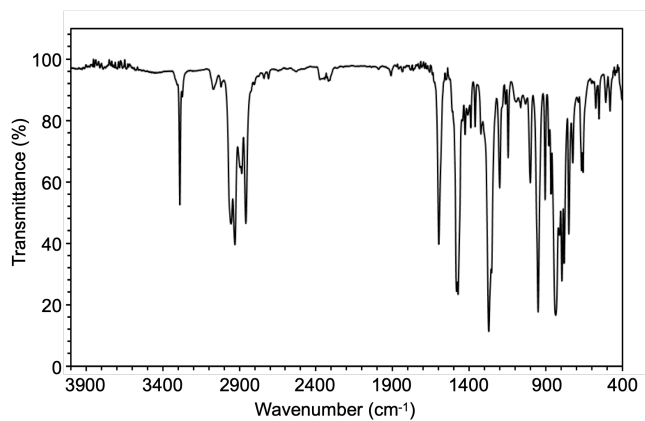

**Fig. S3. Characterization of 4.** FT-IR spectrum of 4 (KBr) at 25 °C.

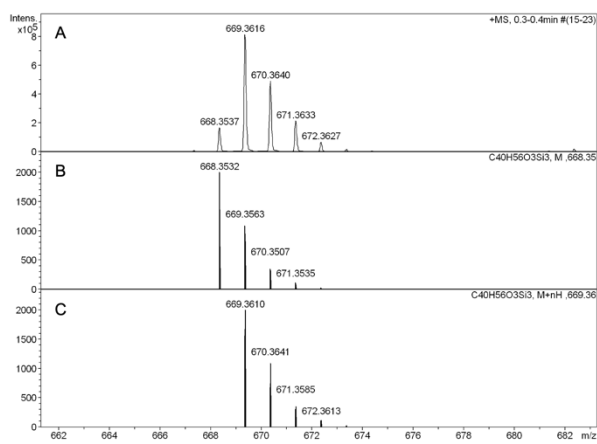

**Fig. S4. Characterization of 4.** (A) Observed and (B,C) simulated high-resolution APCI-TOF mass spectra of 4.

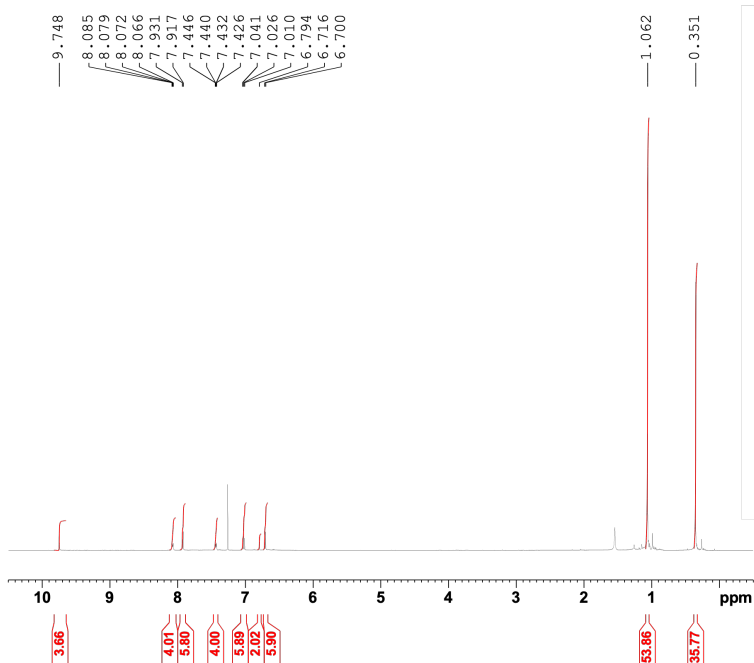

**Fig. S5. Characterization of 5.**  $^1\text{H}$  NMR spectrum (400 MHz) of **5** in  $\text{CDCl}_3$  at 25 °C.

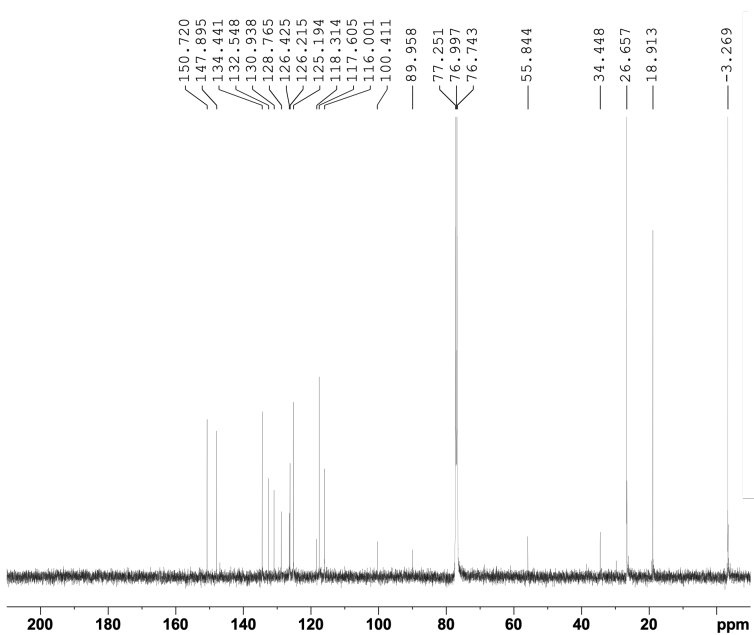

**Fig. S6. Characterization of 5.**  $^{13}\text{C}$  NMR spectrum (126 MHz) of **5** in  $\text{CDCl}_3$  at 25 °C.

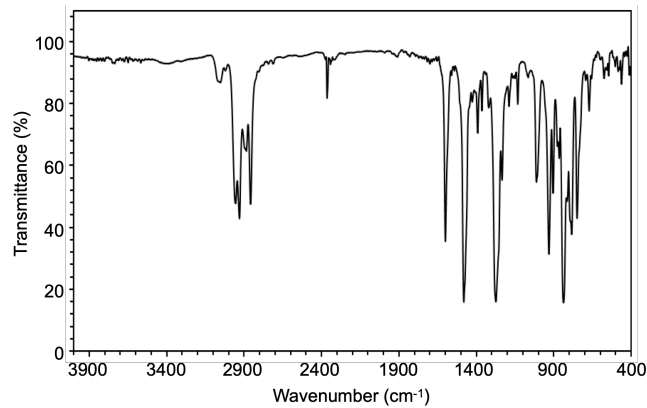

**Fig. S7. Characterization of 5.** FT-IR spectrum of **5** (KBr) at 25 °C.

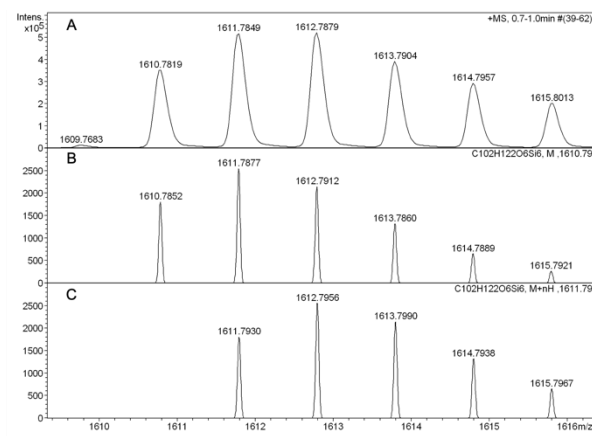

**Fig. S8. Characterization of 5.** (A) Observed and (B,C) simulated high-resolution APCI-TOF mass spectra of **5**.

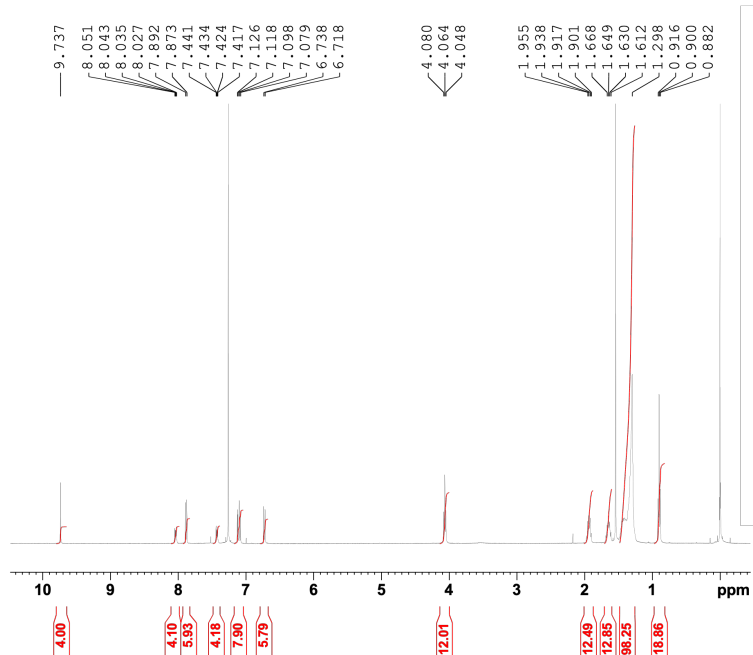

**Fig. S9. Characterization of 1.**  $^1\text{H}$  NMR spectrum (400 MHz) of **1** in  $\text{CDCl}_3$  at 25  $^\circ\text{C}$ .

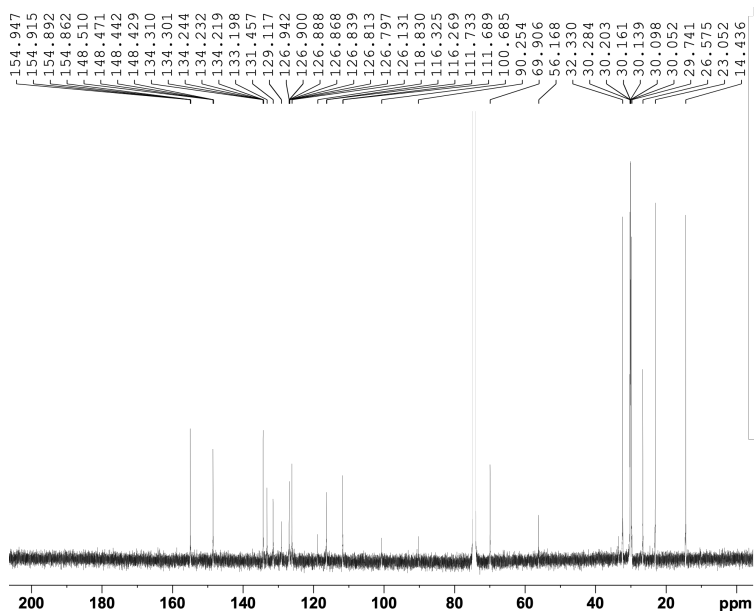

**Fig. S10. Characterization of 1.**  $^{13}\text{C}$  NMR spectrum (126 MHz) of **1** in 1,1,2,2-tetrachloroethane- $d_2$  at 100  $^\circ\text{C}$ .

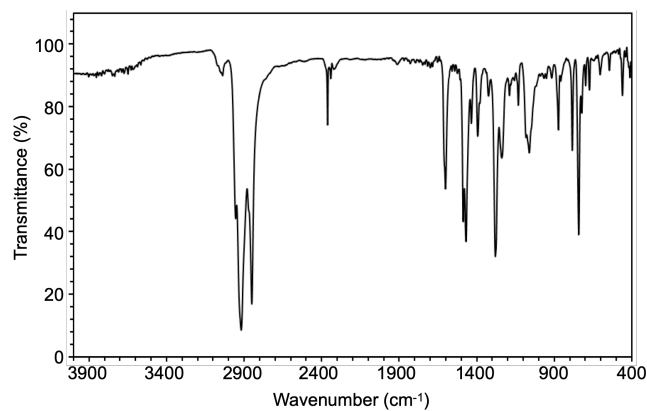

**Fig. S11. Characterization of 1.** FT-IR spectrum of **1** (KBr) at 25 °C.

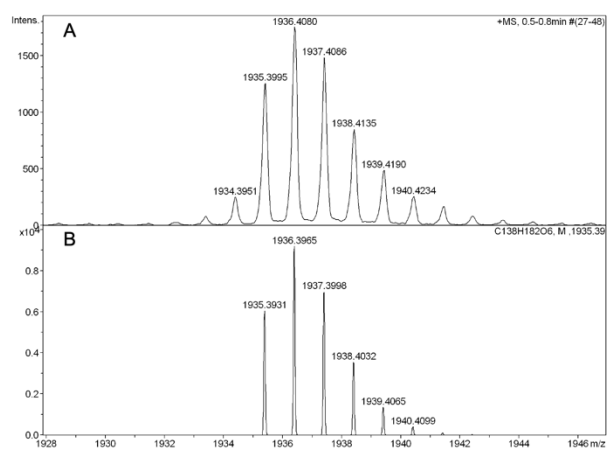

**Fig. S12. Characterization of 1.** (A) Observed and (B) simulated high-resolution APCI-TOF mass spectra of **1**.

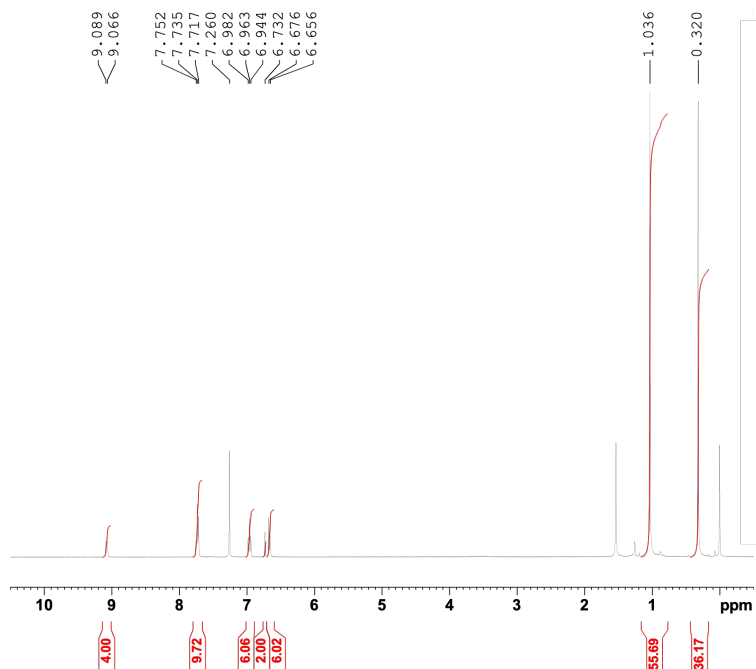

**Fig. S13. Characterization of 6.**  $^1\text{H}$  NMR spectrum (400 MHz) of **6** in  $\text{CDCl}_3$  at 25 °C.

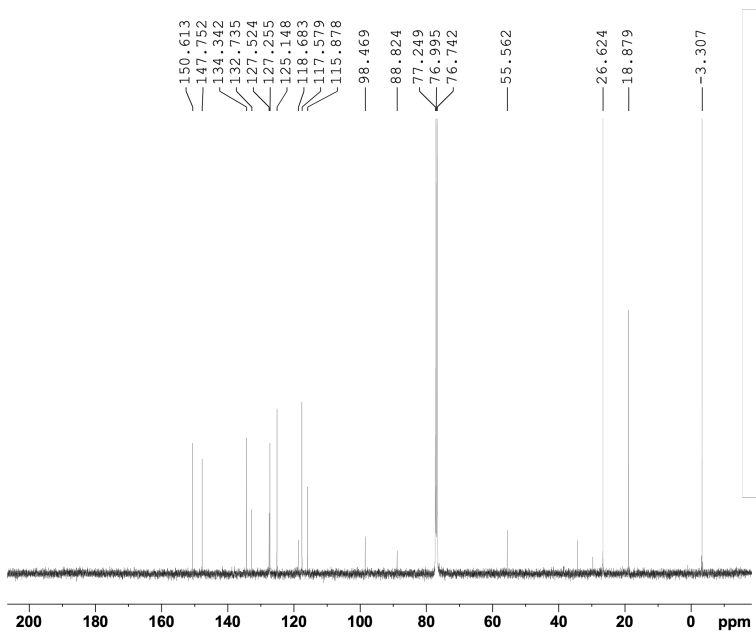

**Fig. S14. Characterization of 6.**  $^{13}\text{C}$  NMR spectrum (126 MHz) of **6** in  $\text{CDCl}_3$  at 25 °C.



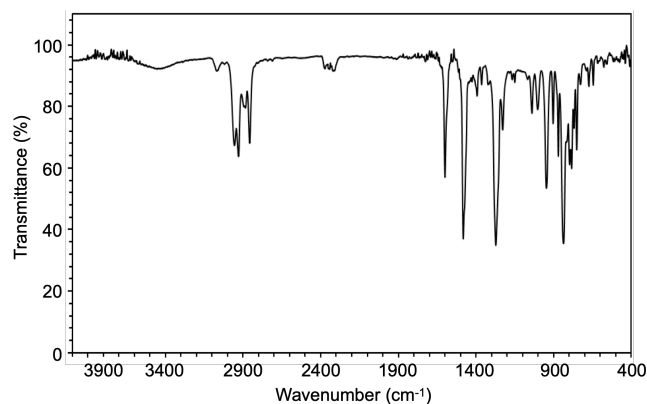

**Fig. S15. Characterization of 6.** FT-IR spectrum of **6** (KBr) at 25 °C.

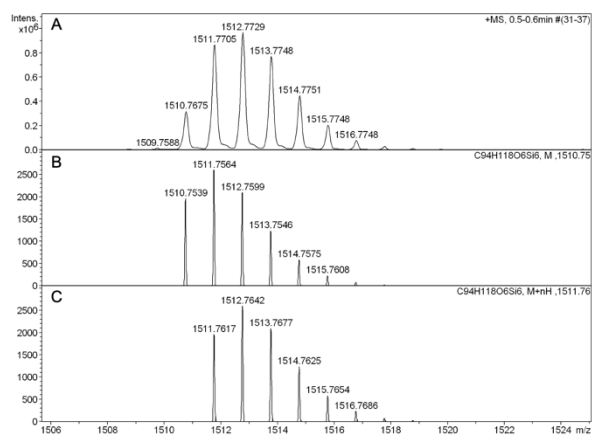

**Fig. S16. Characterization of 6.** (A) Observed and (B,C) simulated high-resolution APCI-TOF mass spectra of **6**.

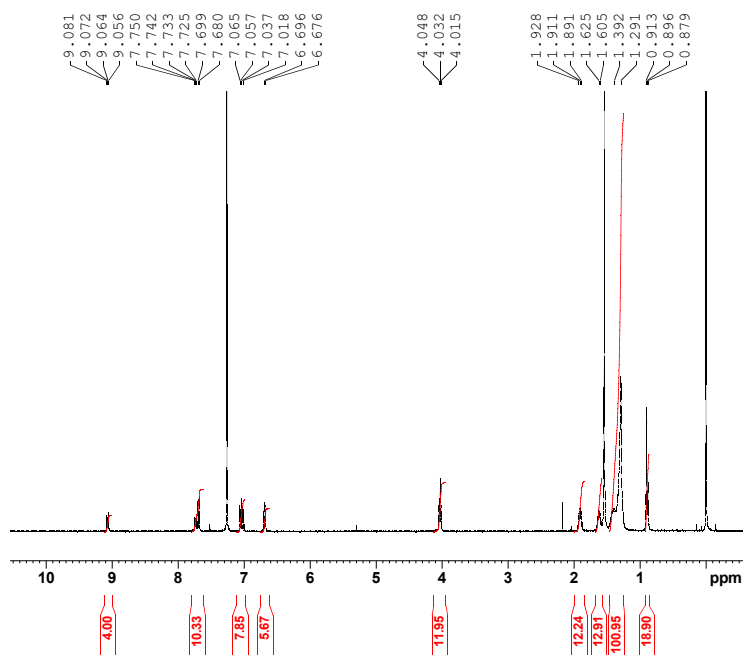

**Fig. S17. Characterization of 2.**  $^1\text{H}$  NMR spectrum (400 MHz) of **2** in  $\text{CDCl}_3$  at 25 °C.

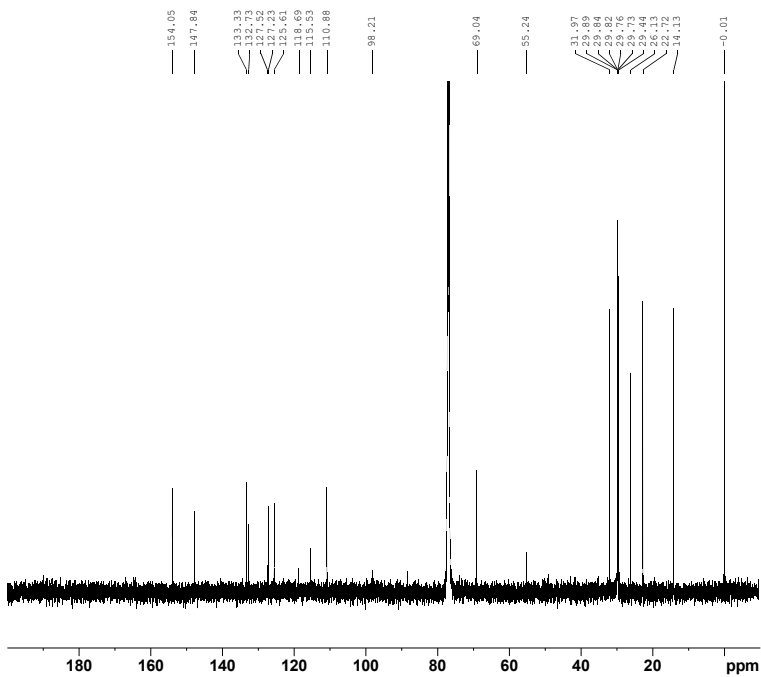

**Fig. S18. Characterization of 2.**  $^{13}\text{C}$  NMR spectrum (126 MHz) of **2** in  $\text{CDCl}_3$  at 25 °C.

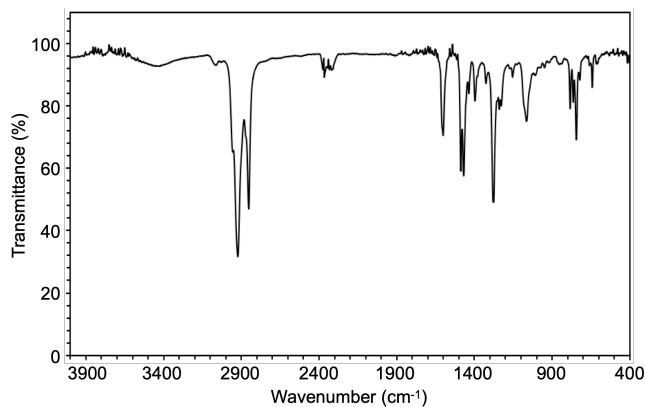

**Fig. S19. Characterization of 2.** FT-IR spectrum of **2** (KBr) at 25 °C.

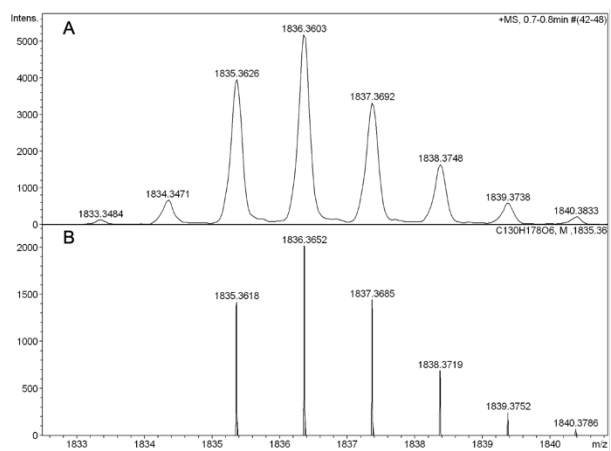

**Fig. S20. Characterization of 2.** (A) Observed and (B) simulated high-resolution APCI-TOF mass spectra of **2**.

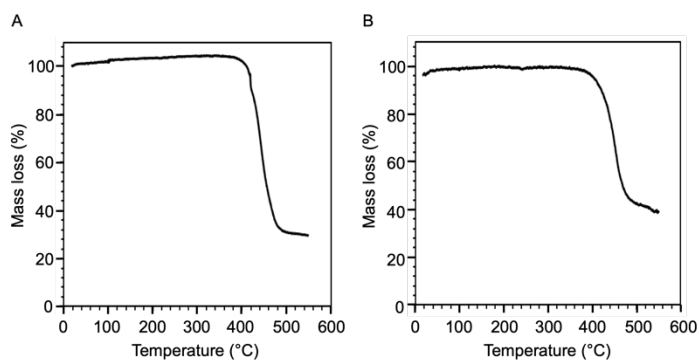

**Fig. S21. Thermal stabilities of 1 and 2.** TGA profiles of (A) **1** and (B) **2** measured at a scan rate of 10 °C/min under a nitrogen flow (50 mL/min).

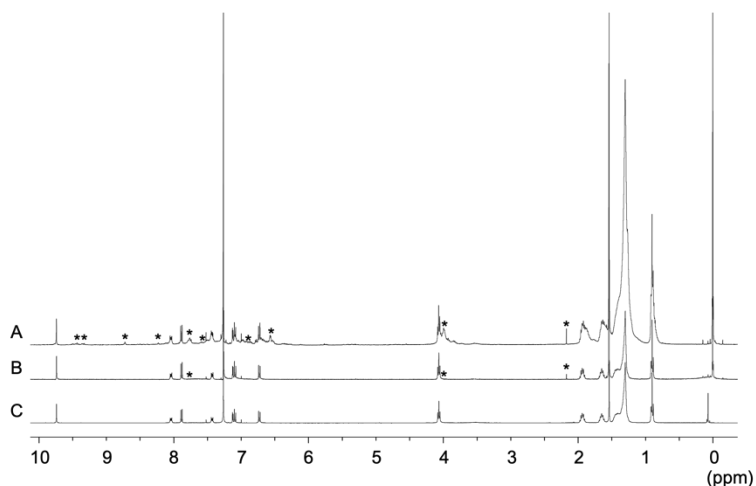

**Fig. S22. Thermal stability of 1.**  $^1\text{H}$  NMR spectra (400 MHz,  $\text{CDCl}_3$ , 25  $^\circ\text{C}$ ) of **1** after thermal treatment at (A) 230  $^\circ\text{C}$ , (B) 200  $^\circ\text{C}$ , and (C) 190  $^\circ\text{C}$  for 30 min under nitrogen. Signals arising from thermolysis products are marked using asterisks.

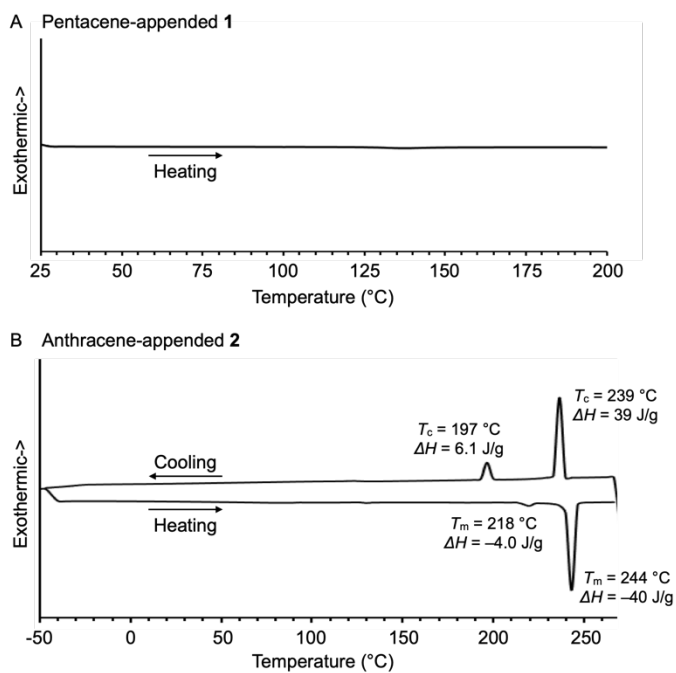

**Fig. S23. Phase-transition behaviors of 1 and 2.** DSC profiles of (A) **1** during a first heating and (B) **2** during a third heating/cooling cycle, measured at a scan rate of 10  $^\circ\text{C}/\text{min}$  under a nitrogen flow (50 mL/min).

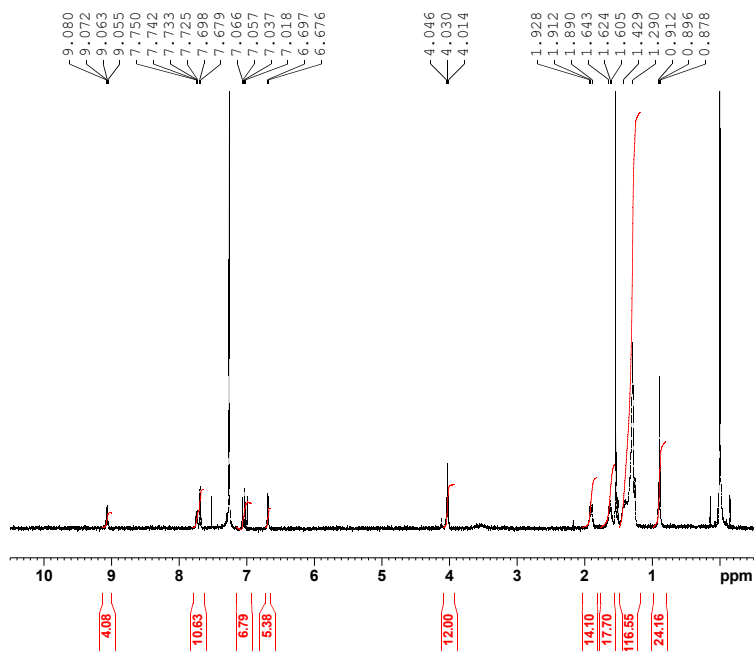

**Fig. S24. Thermal stability of 2.**  $^1\text{H}$  NMR spectrum (400 MHz,  $\text{CDCl}_3$ , 25  $^\circ\text{C}$ ) of **2** after thermal treatment at 270  $^\circ\text{C}$  for 30 min under nitrogen.

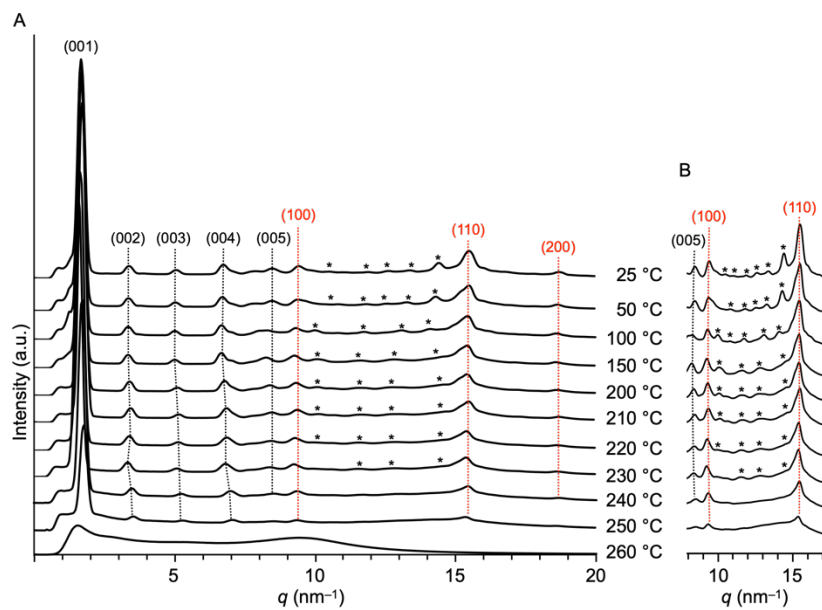

**Fig. S25. Structural characterization of 2.** (A) VT-PXRD patterns of a bulk solid sample of **2** upon heating at a rate of 10  $^\circ\text{C}/\text{min}$  and (B) their magnified views. Minor ill-defined diffractions are marked using asterisks.

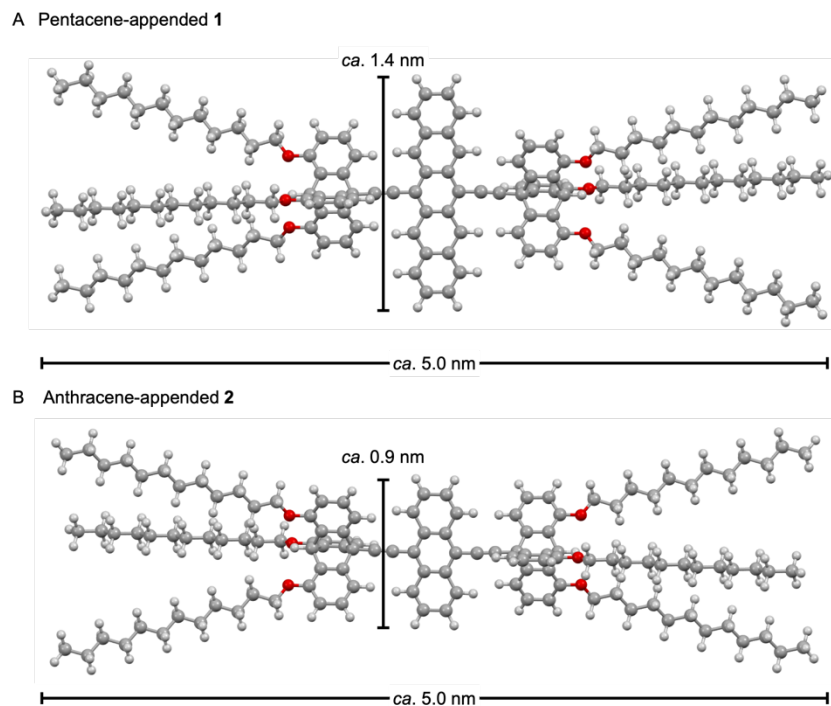

**Fig. S26. Calculated structures of **1** and **2**.** Optimized structures of (A) **1** and (B) **2** obtained by molecular mechanics (MM2) calculations.

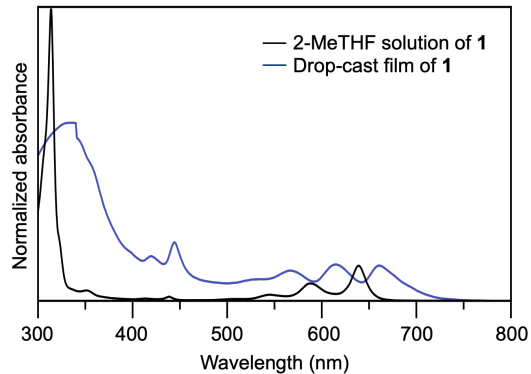

**Fig. S27. Steady-state spectroscopic analysis of **1**.** Absorption spectra of a 2-MeTHF solution (5.0  $\mu$ M) and a drop-cast film of **1** at 25  $^{\circ}$ C under air.

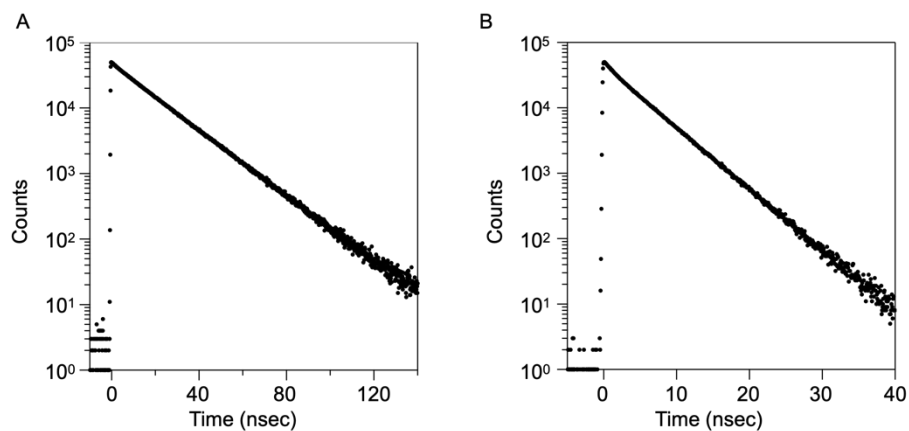

**Fig. S28. Single photon counting analysis of the emission from 1 and 2.** Emission decay profiles of (A) **1** ( $\lambda_{\text{ex}} = 585$  nm) observed at 640 nm and (B) **2** ( $\lambda_{\text{ex}} = 404$  nm) observed at 470 nm in 2-MeTHF (1.0  $\mu\text{M}$ ) at 25  $^\circ\text{C}$  under air.

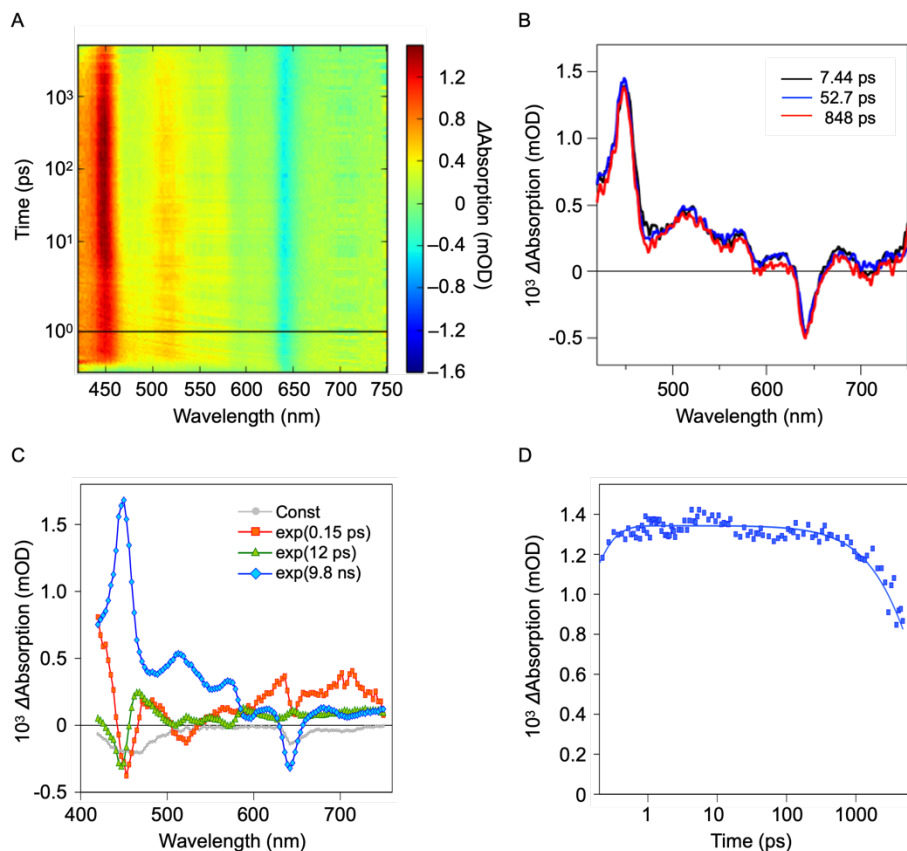

**Fig. S29. Time-resolved spectroscopic analysis of 1.** (A) 2D fs-TA spectra of **1** in 2-MeTHF (5.5  $\mu\text{M}$ ) at 25  $^{\circ}\text{C}$  ( $\lambda_{\text{ex}} = 360 \text{ nm}$ , excitation density = 0.05  $\text{mJ}/\text{cm}^2$ ). (B) TA spectra of **1** at selected delay times taken from (A). (C) DAS of **1** in 2-MeTHF obtained from the global fitting analysis. (D) Decay profile of TA of a drop-cast film of **1** at 456 nm.

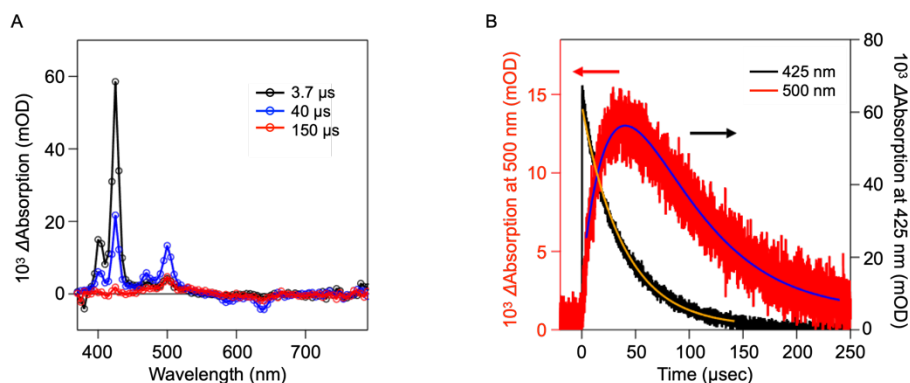

**Fig. S30. Time-resolved spectroscopic analysis of 1.** (A) 1D ns-TA spectra ( $\lambda_{\text{ex}} = 360 \text{ nm}$ ) of **1** in 2-MeTHF (5.5  $\mu\text{M}$ ) in the presence of anthracene (0.30  $\text{mM}$ ) at selected delay times. (B) Time-dependent TA changes at 425 nm (black) and 500 nm (red).



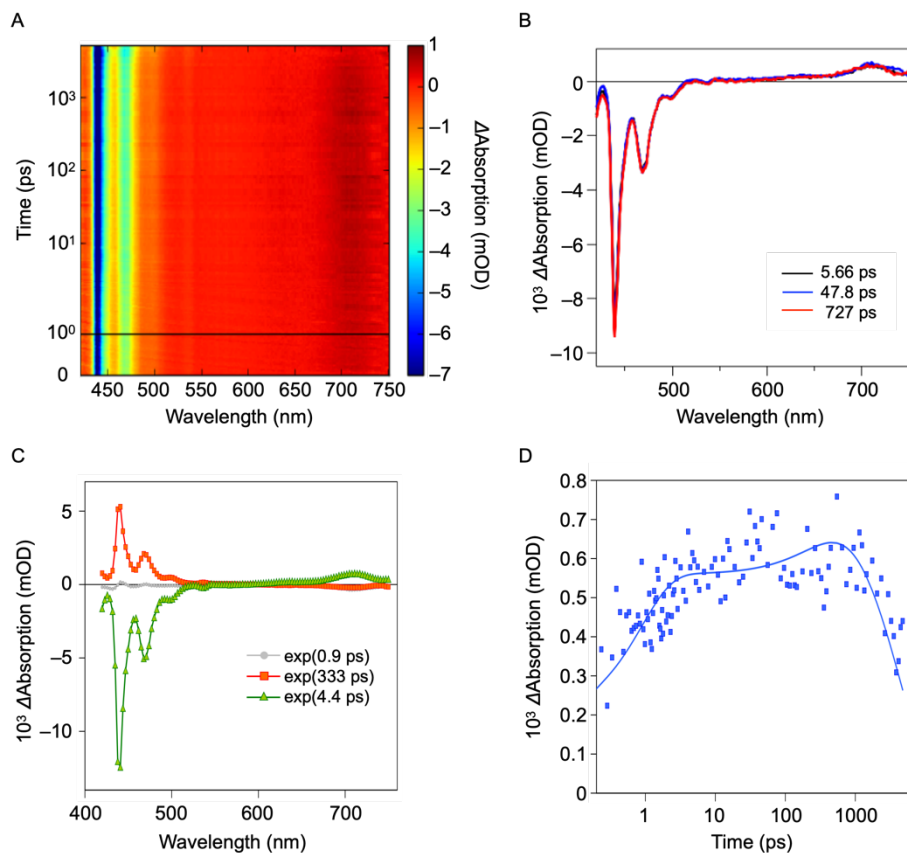

**Fig. S31. Time-resolved spectroscopic analysis of 2.** (A) 2D fs-TA spectra of **2** in 2-MeTHF (5.0  $\mu\text{M}$ ) at 25  $^{\circ}\text{C}$  ( $\lambda_{\text{ex}} = 400 \text{ nm}$ , excitation density = 0.2  $\text{mJ}/\text{cm}^2$ ). (B) TA spectra of **2** at selected delay times taken from (A). (C) DAS of **2** in 2-MeTHF obtained from the global fitting analysis. (D) Decay profile of TA of a drop-cast film of **2** at 711 nm.

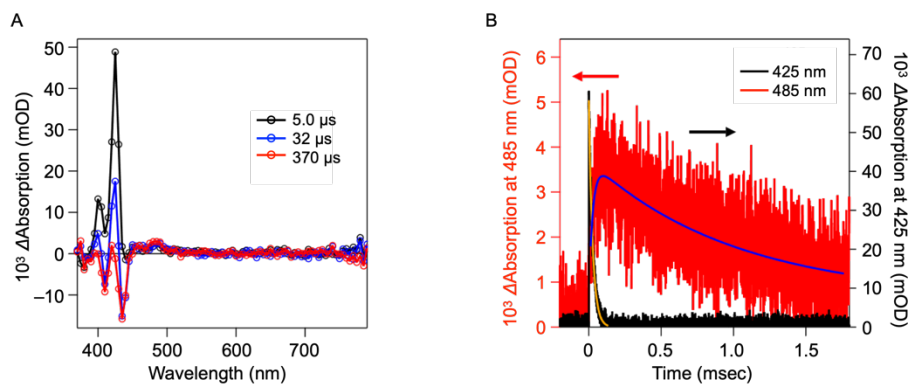

**Fig. S32. Time-resolved spectroscopic analysis of 2.** (A) 1D ns-TA spectra ( $\lambda_{\text{ex}} = 360 \text{ nm}$ ) of **2** in 2-MeTHF (5.0  $\mu\text{M}$ ) in the presence of anthracene (0.30 mM) at selected delay times. (B) Time-dependent TA changes at 425 nm (black) and 485 nm (red).

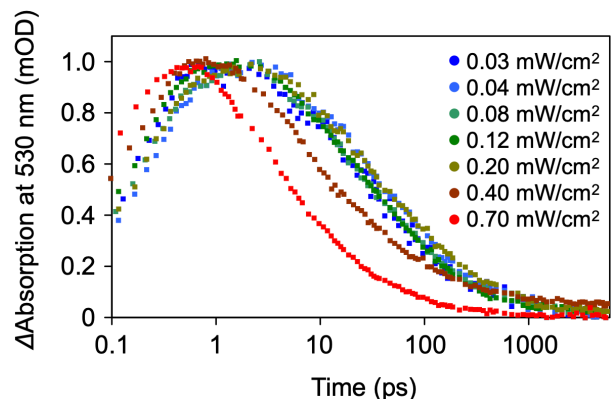

**Fig. S33. Time-resolved spectroscopic analysis of 1.** Decay profiles of the fs-TA of a drop-cast film of **1** at 530 nm, observed after laser-pulse excitation with different energy densities at 360 nm. There was no change in the decay profiles of a T-T absorption of the pentacene chromophore at 530 nm in the energy density range of 0.03 to 0.2 mJ/cm<sup>2</sup>.

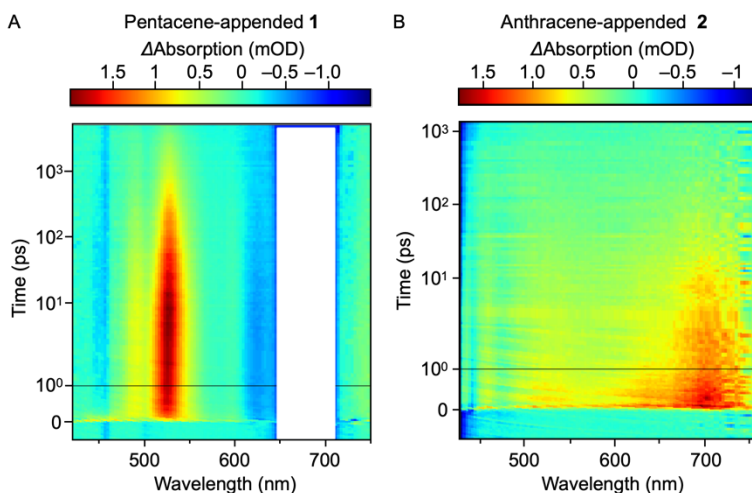

**Fig. S34. Time-resolved spectroscopic analysis of 1 and 2.** 2D fs-TA spectra of a drop-cast films of (A) **1** ( $\lambda_{\text{Ex}} = 670$  nm) and (B) **2** ( $\lambda_{\text{Ex}} = 400$  nm) on a quartz substrate. The time scale is linear till 1 ps delay (indicated by a horizontal black line) and logarithmic at longer delays. For (A), the white rectangle covers the scattering of the excitation pulse around 670 nm.

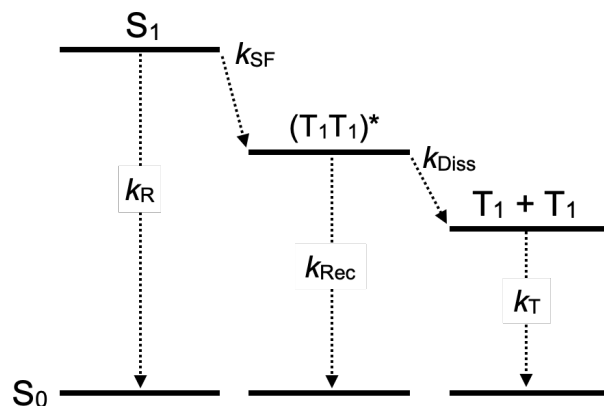

**Fig. S35. Time-resolved spectroscopic analysis of 1.** Schematic kinetic model involving  $S_1$ ,  $(T_1T_1)^*$ , and  $T_1+T_1$ , used for global fitting analysis of the 2D fs-TA spectra of **1** (fig. S34A), where  $k_R$ ,  $k_{SF}$ ,  $k_{Rec}$ ,  $k_{Diss}$ , and  $k_T$  are the rate constants for the  $S_1 \rightarrow S_0$  transition, SF,  $(T_1T_1)^* \rightarrow S_0$  transition, dissociation of  $(T_1T_1)^*$  into  $T_1+T_1$ , and  $T_1 \rightarrow S_0$  transition, respectively.

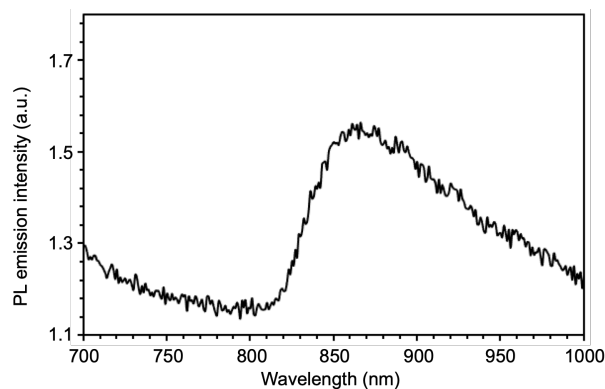

**Fig. S36. Spectroscopic analysis of the phosphorescence from 2.** Phosphorescence spectrum of **2** (1.0  $\mu\text{M}$ ) upon excitation at 410 nm in a glassy matrix of 2-MeTHF/iodomethane (9/1 v/v) at 77 K.

**Table S1. Lifetimes of the excited-state chemical species of 1.** The lifetimes ( $\tau$ ) for singlet excited state ( $S_1$ ), a triplet pair  $[(T_1T_1)^*]$ , and free triplets ( $T_1+T_1$ ) of **1** obtained by global fitting analysis shown in Fig. 5.

|              | Lifetime ( $\tau$ ) |
|--------------|---------------------|
| $S_1$        | $0.15 \pm 0.01$ ps  |
| $(T_1T_1)^*$ | $3 \pm 0.1$ ps      |
| $T_1+T_1$    | 240 ps              |

**Table S2. Lifetimes of the excited-state chemical species of 2.** The lifetimes ( $\tau$ ) for singlet excited state ( $S_1$ ) and excimer of **2** obtained by global fitting analysis shown in Fig. 5.

|         | Lifetime ( $\tau$ ) |
|---------|---------------------|
| $S_1$   | 2.3 ps              |
| Excimer | 850 ps              |
